# Supplementary material for: Remote reefs and seamounts are the last refuges for marine predators across the Indo-Pacific
Source: PLoS Biol. 2019 Aug 6;17(8):e3000366. doi: 10.1371/journal.pbio.3000366 (PMC6684043; doi:10.1371/journal.pbio.3000366)
Supplement: S1 Table — BRUVS, baited remote underwater video system. (XLSX) [file pbio.3000366.s003.xlsx]

## Sheet: Sheet1
Family name	Scientific name	Depth range (m)	Sum of MaxN	Number of deployment	Max Length (cm)
Acanthuridae	Naso annulatus	25-60	2	1	100
	Naso brevirostris	2-122	6	1	60
	Naso caesius	15-50	12	3	46
	Naso hexacanthus	6-150	11	2	75
	Naso sp.	-	1	1	61
	Naso tonganus	3-20	6	2	60
	Naso vlamingii	1-50	3	1	60
Apogonidae	Ostorhinchus holotaenia	15-35	1	1	8
Ariommatidae	Ariomma indicum	20-300	6	3	25
Aulostomidae	Aulostomus chinensis	3-122	3	3	80
Balistidae	Canthidermis maculatus	1-110	3	3	50
	Pseudobalistes flavimarginatus	2-50	1	1	60
	Pseudobalistes fuscus	30-50	5	2	55
Belonidae	Tylosurus crocodilus	1-13	2	1	150
Blenniidae	Aspidontus dussumieri	1-20	79	60	12
	Aspidontus sp.	-	4	4	12
	Aspidontus taeniatus	1-25	40	30	12
	Plagiotremus tapeinosoma	1-30	2	2	14
Caesionidae	Caesio caerulaurea	1-50	73	2	35
	Caesio teres	5-50	42	2	40
	Pterocaesio digramma	1-50	10	1	30
Carangidae	Alectis ciliaris	60-100	48	8	100
	Alepes apercna	5-80	20	12	30
	Atule mate	1-80	11	8	30
	Carangidae sp.	-	390	134	104
	Carangoides armatus	1-59	25	22	58
	Carangoides chrysophrys	30-60	1	1	72
	Carangoides ferdau	1-60	222	75	70
	Carangoides sp.	-	1	1	67
	Caranx ignobilis	10-188	5	5	170
	Caranx sexfasciatus	1-146	870	230	120
	Decapterus macarellus	1-400	1511	131	46
	Decapterus muroadsi	1-320	1426	80	50
	Decapterus sp.	-	10723	298	48
	Elagatis bipinnulata	1-150	426	71	180
	Naucrates ductor	1-300	58	33	70
	Pseudocaranx dentex	10-238	100	19	122
	Pseudocaranx sp.	-	5	2	122
	Scomberoides lysan	1-100	722	3	110
	Seriola hippos	-	1	1	140
	Seriola lalandi	3-825	106	29	250
	Seriola sp.	-	1	1	200
	Seriolina nigrofasciata	20-150	40	27	70
Carcharhinidae	Carcharhinidae sp.	-	6	6	304
	Carcharhinus albimarginatus	1-800	124	60	300
	Carcharhinus amblyrhynchoides	-	1	1	161
	Carcharhinus amblyrhynchos	1-1000	155	47	255
	Carcharhinus amboinensis	1-150	1	1	280
	Carcharhinus brachyurus	3-360	8	6	325
	Carcharhinus brevipinna	1-100	1	1	300
	Carcharhinus cautus	-	1	1	150
	Carcharhinus falciformis	1-4000	106	66	350
	Carcharhinus galapagensis	1-286	280	35	370
	Carcharhinus leucas	1-152	2	2	360
	Carcharhinus limbatus	1-100	56	45	275
	Carcharhinus longimanus	1-230	2	2	400
	Carcharhinus plumbeus	1-500	5	5	180
	Carcharhinus sorrah	1-140	24	18	160
	Carcharhinus sp.	-	15	15	276
	Galeocerdo cuvier	1-800	14	14	750
	Prionace glauca	1-1000	1	1	400
	Rhizoprionodon acutus	1-200	3	3	175
Chaetodontidae	Chaetodon lunula	1-170	1	1	20
Cheloniidae	Cheloniidae sp.	-	10	10	NA
	Lepidochelys olivacea	-	3	3	NA
Clupeidae	Clupeidae sp.	-	37	2	7
Coryphaenidae	Coryphaena hippurus	1-85	166	34	210
Dasyatidae	Dasyatis kuhlii	1-170	2	1	70
Delphinidae	Orcinus orca	-	1	1	NA
	Pseudorca crassidens	-	1	1	NA
Diodontidae	Diodon hystrix	2-50	1	1	91
Echeneidae	Echeneis naucrates	1-85	105	64	110
	Remora remora	1-200	13	8	86
	Remorina albescens	1-200	1	1	98
Fistulariidae	Fistularia commersonii	1-132	10	10	160
	Fistularia petimba	10-200	5	3	200
	Fistularia sp.	-	38	18	180
	Fistulariidae sp.	-	28	22	180
Hydrophiidae	Hydrophiidae sp.	-	8	8	150
	Hydrophis sp.	-	1	1	150
Istiophoridae	Istiompax indica	1-915	11	11	465
	Istiophorus platypterus	1-200	4	4	348
	Makaira mazara	1-200	4	4	500
	Makaira nigricans	1-200	1	1	500
Kyphosidae	Kyphosus cornelii	-	1	1	70
	Kyphosus sydneyanus	-	1	1	80
Lamnidae	Isurus oxyrinchus	1-740	6	6	400
Lutjanidae	Aprion virescens	1-180	1	1	112
	Lutjanidae sp.	-	1	1	112
Molidae	Mola sp.	20-480	4	4	333
Monacanthidae	Aluterus monoceros	1-80	172	59	76.2
	Aluterus scriptus	3-120	161	56	110
	Cantherhines fronticinctus	1-43	1265	146	25
	Monacanthidae sp.	-	131	83	54
	Paramonacanthus filicauda	-	31	15	22
	Pseudomonacanthus peroni	-	1	1	35
Mullidae	Mullidae sp.	-	198	3	50
	Parupeneus barberinus	1-100	2	1	60
	Parupeneus macronemus	3-40	110	14	40
Myliobatidae	Aetobatus narinari	1-80	12	3	330
	Manta birostris	1-120	5	4	910
	Mobula japonica	1-200	1	1	310
Nomeidae	Psenes sp.	-	1429	182	26
Pomacentridae	Abudefduf vaigiensis	1-15	10	1	20
	Dascyllus reticulatus	1-50	43	1	9
	Dascyllus trimaculatus	1-55	11	1	14
	Pomacentrus caeruleus	1-20	6	6	10
	Pomacentrus coelestis	1-20	21	1	9
Priacanthidae	Priacanthus blochii	15-30	2	1	35
	Priacanthus sp.	-	5	3	35
Rachycentridae	Rachycentron canadum	1-1200	13	3	200
Rhincodontidae	Rhincodon typus	1-700	1	1	1600
Scaridae	Scarus chameleon	3-30	2	2	31
Scombridae	Acanthocybium solandri	3-20	45	38	250
	Euthynnus affinis	1-200	570	8	100
	Euthynnus sp.	-	6	1	100
	Grammatorcynus bicarinatus	-	3	2	112
	Grammatorcynus bilineatus	-	11	4	100
	Gymnosarda unicolor	10-100	3	3	248
	Sarda sp.	-	17	1	102
	Scomberomorus commerson	10-70	80	28	240
	Scombridae sp.	-	37	20	181
	Thunnus alalunga	1-600	78	3	140
	Thunnus albacares	1-250	11	2	239
	Thunnus obesus	1-250	6	4	250
	Thunnus sp.	-	170	5	215
Sphyraenidae	Sphyraena barracuda	1-100	42	41	200
	Sphyraena jello	20-200	1	1	150
	Sphyraena qenie	1-100	1	1	170
	Sphyraena sp.	-	4	3	173
	Sphyraenidae sp.	-	1	1	173
Sphyrnidae	Sphyrna lewini	1-1000	13	13	430
	Sphyrna mokarran	1-300	14	10	610
	Sphyrna sp.	-	2	2	520
	Grand Total		23200	2726	NA
