# Supplementary material for: Remote reefs and seamounts are the last refuges for marine predators across the Indo-Pacific
Source: PLoS Biol. 2019 Aug 6;17(8):e3000366. doi: 10.1371/journal.pbio.3000366 (PMC6684043; doi:10.1371/journal.pbio.3000366)
Supplement: S2 Data — BRT, boosted regression tree. (XLSX) [file pbio.3000366.s006.xlsx]

## Sheet: S2_Data.csv
Variable	Response	Variance explained	SD	Variable type
SST median	Max Size	14.1804	2.32	Environmental
Depth	Max Size	45.6279	0.26	Geomorphology
Dist seamount	Max Size	16.9511	0.23	Geomorphology
Dist market	Max Size	12.3262	0.34	Human pressure
Dist pop	Max Size	10.9145	1.6	Human pressure
Dist CoralTri	Shark Abundance	12.0066	0.42	Environmental
SST SD	Shark Abundance	9.03079	0.32	Environmental
Chla median	Shark Abundance	14.5485	0.07	Environmental
Dist coast	Shark Abundance	10.2087	0.15	Geomorphology
Depth	Shark Abundance	13.1019	0.15	Geomorphology
Dist seamount	Shark Abundance	12.1719	0.44	Geomorphology
Dist market	Shark Abundance	20.4381	0.43	Human pressure
Dist pop	Shark Abundance	8.49349	0.15	Human pressure
Dist CoralTri	Species Richness	20.3216	0.17	Environmental
SST median	Species Richness	17.9847	0.13	Environmental
SST SD	Species Richness	11.0862	0.32	Environmental
Dist coast	Species Richness	22.2845	0.69	Geomorphology
Depth	Species Richness	18.0968	0.49	Geomorphology
Dist seamount	Species Richness	10.2262	0.45	Geomorphology
