# Supplementary material for: Remote reefs and seamounts are the last refuges for marine predators across the Indo-Pacific
Source: PLoS Biol. 2019 Aug 6;17(8):e3000366. doi: 10.1371/journal.pbio.3000366 (PMC6684043; doi:10.1371/journal.pbio.3000366)
Supplement: S2 Table — Spatial autocorrelation as reported by Moran’s I for the three models, in the observations only, and in the residuals of the BRT with autocovariate. An index of 1 indicates high positive autocorrelation; 0 no autocorrelation; −1 high negative autocorrelation. BRT, boosted regression tree. (XLSX) [file pbio.3000366.s004.xlsx]

## Sheet: Sheet1
Model features	Vertebrate species Richness	Weighted Body Size	Shark abundance
			Log[SumMaxN +1]
Tree complexity	5	5	5
Number of Trees	50	50	50
Learning Rate	0.01	0.01	0.01
Bag Fraction	0.5	0.5	0.5
Family	Poisson	Gaussian	Gaussian
Max Trees	1000	1000	1000
Spatial autocorrelation in observations	0.22	0.36	0.44
Spatial autocorrelation in residuals of final autocovariate model	0.023	0.24	-0.13
